# Supplementary material for: Quantitative analysis of insulin-like growth factor 2 receptor and insulin-like growth factor binding proteins to identify control mechanisms for insulin-like growth factor 1 receptor phosphorylation
Source: PubMed Central journal article supplement (PMC4746774; doi:10.1186/s12918-016-0263-6), 2016-02-09
Supplement: 12918_2016_263_MOESM2_ESM.pdf [file 12918_2016_263_MOESM2_ESM.pdf]

**Additional File 2**

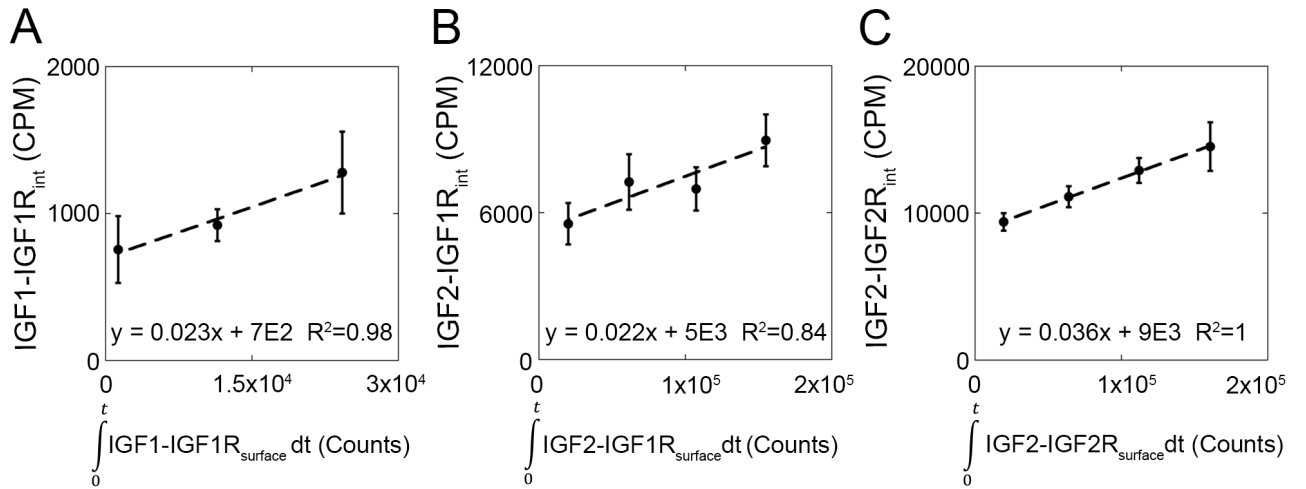

**Internalization rates for IGF receptors in OVCAR5.** The internalization rates for IGF1-IGF1R (**A**), IGF2-IGF1R (**B**), and IGF2-IGF2R (**C**) were determined from the slope of the internalized ligand versus the integrated surface-associated ligand.
